# Supplementary material
Source: Springer Nature journal article supplement (https://www.springerprofessional.de/resource/supplementary/13638_2011_184_MOESM3_ESM.pdf/11897244)

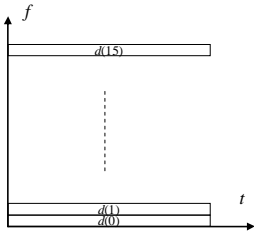

(a) Conventional OFDM ( $N_c=16$ )

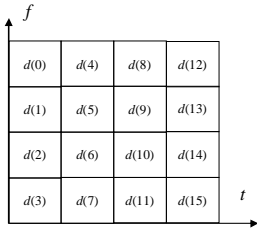

(b) OFDM/TDM ( $N_c=16$ ;  $N_m=4$ ,  $K=4$ )

Supplement: MOESM3 [file 11897244]
